# Integrating Vectors for Genetic Studies in the Rare Actinomycete *Amycolatopsis marina*

Hong Gao<sup>1,\*</sup>, Buvani Murugesan<sup>1</sup>, Janina Hoßbach<sup>1</sup>, Stephanie K. Evans<sup>1</sup>, W. Marshall Stark<sup>2</sup> and Margaret C.M. Smith<sup>1</sup>

<sup>1</sup> Department of Biology, University of York, York, North Yorkshire, UK, YO10 5DD

<sup>2</sup> Institute of Molecular, Cell and Systems Biology, University of Glasgow, Glasgow, UK, G12 8QQ

\* Communicating author: [gaohong221@gmail.com](mailto:gaohong221@gmail.com)

## Abstract:

Few natural product pathways from rare Actinomycetes have been studied due to the difficulty in applying molecular approaches in these genetically intractable organisms. In this study, we sought to identify integrating vectors, using phage *int/attP* loci, that would efficiently integrate site-specifically in the rare Actinomycete, *Amycolatopsis marina* DSM45569. Analysis of the genome of *A. marina* DSM45569 indicated the presence of *attB*-like sequences for TG1 and R4 integrases. The TG1 and R4 *attBs* were active in *in vitro* recombination assays with their cognate purified integrases and *attP* loci. Integrating vectors containing either the TG1 or R4 *int/attP* loci yielded exconjugants in conjugation assays from *E. coli* to *A. marina* DSM45569. Site-specific recombination of the plasmids into the host TG1 or R4 *attB* sites was confirmed by sequencing. The presence of homologous TG1 and R4 *attB* sites in other species of this genus indicates that vectors based on TG1 and R4 integrases could be widely applicable.

## Importance:

Rare Actinomycetes have the same potential of natural product discovery as Streptomyces, but the potential has not been fully explored due to the lack of efficient molecular biology tools. In this study, we identified two serine integrases, TG1 and R4, which could be used in the rare Actinomycetes species, *Amycolatopsis*

31 *marina*, as tools for genome integration. The high level of conservation between the  
32 *attB* sites for TG1 and R4 in a number of *Amycolatopsis* species suggested that  
33 plasmids with the integration systems from these phages should be widely useful in  
34 this genus.

35

36 **Keywords:** Rare Actinomycetes, *Amycolatopsis*, integrating vectors, TG1 integrase, R4  
37 integrase

38

## 39 Introduction

40 *Streptomyces* bacteria are widely exploited for their abundant bioactive natural  
41 products(1). However, after 70 years of exploitation, the rate of discovery of new  
42 *Streptomyces*-derived bioactive products has declined, and interest in other  
43 potential non-*Streptomyces* sources, such as the rare Actinomycetes, has grown(2,  
44 3).

45

46 Amongst rare Actinomycetes, the *Amycolatopsis* genus is of particular interest for its  
47 production of important antibiotics such as vancomycin(4) and rifamycin(5), as well  
48 as a diverse range of active natural products(6-8). The publicly available NCBI  
49 database contains nearly 70 genomes of *Amycolatopsis* strains, covering more than  
50 40 species from this genus. Similar to *Streptomyces*, the genome of each  
51 *Amycolatopsis* contains, on average, over 20 secondary metabolic gene clusters(9).  
52 The mining of these metabolic clusters offers great potential for novel antibiotic  
53 discovery. However, the lack of widely available and efficient genetic tools for these  
54 rare species impedes their potential in research and development.

55

56 Phage-encoded serine and tyrosine integrases catalyse site-specific integration of a  
57 circularized phage genome into the host chromosome as part of the process to  
58 establish a lysogen. DNA integration mediated by serine integrases occurs between  
59 short (approximately 50 bp) DNA substrates that are located on the phage genome,  
60 (the phage attachment site *attP*) and the host genome (the bacterial attachment site  
61 *attB*). The product of *attP* x *attB* recombination is an integrated phage genome  
62 flanked by two new sites, *attL* and *attR*, each of which contains half-sites from *attP*  
63 and *attB*. During phage induction, integrase in the presence of a recombination  
64 directionality factor (RDF) again mediates site-specific recombination, but this time  
65 between *attL* and *attR*, to excise the phage genome, which can then be replicated  
66 during a lytic cycle. The mechanism of recombination and the factors that control  
67 integration versus excision have been elucidated in recent years(10-12).

68

69 Integrating vectors based on the *Streptomyces* phage  $\phi$ C31 integrase and *attP* locus  
70 are the best known and most widely used in Actinomycete genome  
71 engineering(13-16). In addition to the phage recombination machinery (*int/attP*),  
72 integrating vectors contain a replicon for maintenance in *E. coli*, an *oriT* for conjugal  
73 transfer and a marker or markers for selection in *E. coli* and in the recipient. They are  
74 powerful genome engineering tools that act in an efficient, highly controllable and  
75 predictable way(17).

76

77 Integrating vectors using serine integrase-mediated recombination require no  
78 additional phage or host functions for integration, an especially important feature  
79 when they are to be used in other organisms that cannot be infected by the phages.  
80 This property makes serine integrase-based vectors promising tools for use in  
81 heterologous systems(11, 18). However, use of these integration vectors has not  
82 been fully explored in rare Actinomycetes, e.g. *Amycolatopsis*. There is only one  
83 reported example of a conjugation system based on  $\phi$ C31 integrase in *Amycolatopsis*  
84 *japonicum* MG417-CF17(19), and it has been reported that other *Amycolatopsis*  
85 species lack  $\phi$ C31 *attB* sites in their chromosomes(20). The  $\phi$ BT1 *attB* sites have been  
86 more commonly identified in *Amycolatopsis*, and there has been successful  
87 conjugative transfer of vectors based on  $\phi$ BT1 *int/attP* in *A. orientalis*(20) and *A.*  
88 *mediterranei*(21). Furthermore, electroporation remains the most widely applied  
89 method for transfer of integrative plasmids into this genus, rather than  
90 conjugation(20, 21).

91

92 In this paper, we chose to study *Amycolatopsis marina* DSM45569, a species isolated  
93 from an ocean-sediment sample collected in the South China Sea(22). We explored  
94 the application of bacterial genetic engineering using serine integrases, and  
95 developed conjugative and integrating vectors for use in this species. We present  
96 evidence suggesting that these vectors could be applied to various other species in

this genus, opening up the prospect for more versatile genetic manipulation of *Amycolatopsis*.

## Materials and Methods

### Bacterial strains and culture conditions

Plasmid propagation and subcloning was conducted using *E. coli* Top10 (F- *mcrA*  $\Delta(mrr-hsdRMS-mcrBC)$   $\phi80lacZ\Delta M15$   $\Delta lacX74$  *nupG* *recA1* *araD139*  $\Delta(ara-leu)7697$  *galE15* *galk16* *rpsL*(Str<sup>R</sup>) *endA1*  $\lambda^{-}$ ). Plasmid conjugations from *E. coli* to *A. marina* DSM45569 were carried out using *E. coli* ET12567(pUZ8002) containing the plasmid to be transferred as the donor (23, 24), and conjugations from *E. coli* to *S. coelicolor* and *S. lividans* were used as control. *E. coli* strains were grown in Luria-Bertani broth (LB) or on LB agar at 37°C.

*Amycolatopsis marina* DSM45569 was purchased from the German Collection of Microorganisms and Cell Cultures (DSMZ, Germany), and maintained on Soya Mannitol (SM) agar at 30°C. Harvested spores were maintained long-term in 20% glycerol at -80°C. Conjugations were plated on SM agar containing 10 mM MgCl<sub>2</sub>, and ISP2 medium(25) was used for the preparation of genomic DNA(24).

### DNA manipulation

*E. coli* transformation and gel electrophoresis were carried out as described previously(26). Genomic DNA preparation from *Streptomyces* was performed following the salting out procedure in the *Streptomyces* manual(24). Plasmids from *E. coli* were prepared using QIAprep® Spin Miniprep Kit (Qiagen, Germany) following the manufacturer's instructions. Polymerase Chain Reaction (PCR) was carried out using Phusion® High-Fidelity DNA Polymerase (NEB, USA) according to the manufacturer's instructions. The primers used in this study are listed in Table 1. DNA samples were purified by the QIAquick Gel Extraction Kit (Qiagen, Germany).

### Plasmid construction

The integrating plasmid pHG4 contains the TG1 *int/attP* locus and the apramycin-resistance gene (*aac3(IV)*) for selection (Figure 1A). The fragment

126 containing *oriT*, *aac3(IV)* and TG1 *int/attP* was amplified from plasmid pBF20(27)  
 127 using the primer pair pHG4-for/pHG4-rev. The fragment was joined via In-Fusion  
 128 cloning to the 3344 bp HindIII-PacI fragment from pBF22(27) (containing the *E. coli*  
 129 plasmid replication origin, the *bla* gene encoding resistance to ampicillin and the  
 130 *actII-orf4/act1p* expression cassette) to form the plasmid pHG4.

131 To construct the integrating plasmid pJH1R4 (Figure 1A), pSET152(28) was cut with  
 132 AatII and PvuI to remove the  $\phi$ C31 *attP* site and integrase gene. R4 phage lysate was  
 133 used as template in a PCR with the primers pJH1R4-for and pJH1R4-rev to amplify  
 134 the R4 *attP* site and integrase coding region. The PCR product was joined to the  
 135 AatII-PvuI fragment from pSET152 via In-Fusion cloning.

136 The plasmid pHG1 (Figure 1B) was used as template to amplify *attB*-containing  
 137 sequences for *in vitro* recombination assays. This plasmid was originally constructed  
 138 for the expression of *EryF*. The *eryF* gene was amplified from *Saccharopolyspora*  
 139 *erythraea* BIOT-0666 genomic DNA using the primer pair pHG1A-for/pHG1A-rev, and  
 140 inserted by In-Fusion cloning into pBF20(27) cut with NheI and PacI to form the  
 141 plasmid pHG1A. The 3785 bp fragment containing the  $\phi$ C31 *int/attP* and hygromycin  
 142 resistance gene was amplified from plasmid pBF27C(27), using the primer pair  
 143 pHG1-for and pHG1-rev. Plasmid pHG1A was digested with XbaI and NheI, and the  
 144 5668 bp fragment was ligated with the 3785 bp PCR fragment from pBF27C by  
 145 In-Fusion to give the plasmid pHG1.

#### 146 ***In Vitro* Recombination Assays**

147 *In vitro* recombination assays were performed using PCR-amplified DNA fragments  
 148 containing the *attB* and *attP* attachment sites located at the ends. Recombination  
 149 between the *attP* and *attB* sites joined the two fragments to give a product whose  
 150 length was almost the sum of the substrates (Figure 3A). To generate the  
 151 *attB*-containing substrates, the forward primer, TG1-*attB*-Am-for, contained the  
 152 closest match in the *A. marina* genome to the characterised TG1 *attB* site from *S.*  
 153 *avermitilis*, TG1 *attB*<sup>5a</sup> (29)(Figure 2). TG1-*attB*-Am-for also had a sequence identical  
 154 to the 3' end of the *act1p* element from plasmid pHG1, which was used as a template  
 155 for PCR (Figure 1). Similarly, the forward primer R4-*attB*-Am-for contained the closest

match in the *A. marina* genome to the characterized R4 *attB* site from *S. parvulus*, R4 *attB*<sup>Sp</sup> (30) (Figure 2). R4-attB-Am-for also had a sequence identical to the 3' end of ActII-orf4 element from the template plasmid pHG1 (Figure 1). Forward primers TG1-attB-Sa-for and R4-attB-Sp-for were used to create positive control recombination substrates containing the TG1 and R4 *attB* sites originally found in *S. avermitilis*(29) and *S. parvulus*(30) respectively. The reverse primer used to generate all the *attB*-containing substrates (attB-rev) was located within the *hyg* gene of pHG1; the amplified products were 1627 bp (TG1 *attB*<sup>Am</sup>), 1035 bp (TG1 *attB*<sup>Sa</sup>), 1854 bp (R4 *attB*<sup>Am</sup>) and 1855 bp (R4 *attB*<sup>Sp</sup>). The DNA fragments containing the *attP* sites were prepared as follows; the TG1-*attP* fragment (2471 bp) was amplified using the primer pair TG1-attP-for/TG1-attP-rev with pHG4 as the template, and the R4-*attP* fragment (990 bp) was amplified using the primer pair R4-attP-for/R4-attP-rev with pJH1R4 as the template (Figure 1). Note that other than the *attB* and *attP* sites, none of the substrates contained any DNA that should interact specifically with the integrases. Moreover, each fragment was designed to be easily identifiable by molecular weight. The integrases were purified as described previously(31, 32). All recombination reactions were in 20 µl final volume. Recombination reactions of TG1 substrates were carried out in TG1 RxE buffer (20 mM Tris [pH 7.5], 25 mM NaCl, 1 mM dithiothreitol [DTT], 10 mM spermidine, 10 mM EDTA, 0.1 mg/ml bovine serum albumin [BSA])(33), and recombination reactions of R4 substrates were carried out in buffer containing 20 mM Tris-HCl (pH 7.5), 50 mM NaCl, 10 mM spermidine, 5 mM CaCl<sub>2</sub> and 50 mM DTT(32). Integrase was added at the concentrations indicated. Recombination substrates were used at 50 ng each per reaction. Reactions were incubated at 30°C overnight, and then heated (10 min, 75°C) to denature integrase. The reaction mixtures were loaded on a 0.8% agarose gel in Tris/Borate/EDTA (TBE) buffer (90 mM Tris base, 90 mM boric acid and 2 mM EDTA) containing ethidium bromide for electrophoretic separation.

183

## 184 Results

## 185 Identification of possible *attB* sequences from the genome of *Amycolatopsis* 186 *marina* DSM45569

187 The sequences of *attB* sites recognised by a variety of integrases ( $\phi$ C31(34),  $\phi$ Joe(35),  
188 Bxb1(36), R4(32), SPBc(37), SV1(38), TG1(29) and TP901(39)) were used in BLAST  
189 searches of the genome sequence of *Amycolatopsis marina* DSM45569 (NCBI  
190 Genome Database NZ\_FOKG000000000) (Table 2). The most significant hits for R4 and  
191 TG1 *attB* sites had the highest identities and lowest *E*-value. The predicted R4 *attB*  
192 site is located within a gene predicted to encode a fatty-acyl-CoA synthase  
193 (SFB62308.1) and the TG1 *attB* site is located within a gene predicted to encode a  
194 putative succinylidiaminopimelate transaminase (WP\_091671332.1). The BLAST  
195 analysis was extended to other species of *Amycolatopsis* to assess the conservation  
196 of these *attB* sites in the genus (Figure 2). Both R4 and TG1 *attB* sites were highly  
197 conserved relative to the *attB* sites originally identified from *S. parvulus*(30) and *S.*  
198 *avermitilis*(29) (84% for R4 and 62% for TG1).

## 199 *A. marinum attB*-like sequences for TG1 and R4 are both active in *in vitro* 200 recombination

201 In each recombination reaction, substrates containing *attP* and the putative *attB* site  
202 were mixed in cognate pairs with different concentrations of purified R4 or TG1  
203 integrase in the corresponding buffer and incubated overnight at 30°C, as described  
204 in Materials and Methods. The expected recombination events and the nature of the  
205 products are shown in Figure 3A-3C. TG1 catalysed recombination between the  
206 substrates more efficiently than R4 (Figure 3D). As expected because neither phage is  
207 an *Amycolatopsis* phage, the recombination efficiencies for each integrase were  
208 observably better when the *Streptomyces attB* sites were used (Figure 3E) compared  
209 to the *A. marina attB* sites (Figure 3D), particularly for TG1 integrase. Nevertheless,  
210 the presence of recombination activity indicated that both *A. marina attB* sites were  
211 functional and were likely to be active integration sites for integrative conjugation  
212 vectors.

## 213 *In vivo* integration

214 *A. marina* DSM45569 was unable to grow in the presence of apramycin, so



integrating plasmids pHG4 and pJH1R4, containing the apramycin resistance determinant *aac3(IV)*, were constructed. Following the standard *Streptomyces* conjugation protocol (see Materials and Methods), a frequency of approximately 160 exconjugants/10<sup>8</sup> spores was obtained for transfer of pHG4 (encoding TG1 integrase), while the conjugation efficiency of pJH1R4 (R4 integrase) was only 20 exconjugants/10<sup>8</sup> spores (Table 3). For each integration, six exconjugants were picked at random and streaked on MS agar containing apramycin. Genomic DNA was then prepared and used as the template in PCR reactions, in which the primer pairs of TG1-attL-Am-for/rev and R4-attL-Am-for/rev were used to test for the occurrence of recombination at the expected TG1 and R4 *attB* sites (Figure 4). All PCR reactions using exconjugants as templates gave the expected band sizes. Sequencing (GATC, Germany) of the PCR products with the primers TG1-attL-Am-for and R4-attL-Am-for confirmed that the plasmids had integrated into the predicted *attB* sites for TG1 or R4 integrase within *A. marina* DSM45569 (Figure 5).

## Discussion

The lack of effective genetic engineering tools is considered one of the greatest hindrances in the search for novel natural products from rare Actinomycetes(40-42). Previous studies in rare Actinomycete species have largely focused on the use of the well-characterised  $\phi$ C31-based integration vectors, and have mostly overlooked tools based on other phage integrases(43-45). Additionally, the conjugation methods used widely in *Streptomyces* gene transfer because of their ease have shown little success in rare Actinomycetes, including species in the genus *Amycolatopsis*, so electroporation has been the long-preferred method of gene transfer for species in this genus(5, 9, 46, 47). However, the growing interest in the use of serine integrases for synthetic biology applications(11) has led to further research into expanding the pool of available enzymes and their potentials as genetic tools(48-50). Therefore, within this study, we explored whether integrating vectors based on eight different serine integrases could be employed for genetic engineering of *A. marina* DSM45569. Sequence analysis of the *A. marina* DSM45569 genome identified close matches to

the *attB* sites used by TG1 and R4 integrases. Although conjugation frequencies were low, integrating plasmids based on the TG1 and R4 recombination systems successfully integrated into the expected *attB* sites in *A. marina* DSM45569. Conservation between the *attB* sites for TG1 and R4 in a number of *Amycolatopsis* species is high, suggesting that plasmids with the integration systems from these phages should be widely useful in this genus.

250

As is common with serine integrase-mediated recombination, the *attB* sites in *A. marina* are located within open reading frames and potentially disrupt the gene. The TG1 *attB*<sup>Am</sup> site is located within a gene predicted to encode a putative succinyl-diaminopimelate transaminase (WP\_091671332.1), and the R4 *attB*<sup>Am</sup> site is located within a gene predicted to encode a fatty-acyl-CoA synthase (SFB62308.1). Compared to the wild-type (unintegrated) strain, the strains with integrated pHG4 or pJH1R4 did not show any difference in growth. However, further study is required to investigate the effects of TG1 or R4 plasmid recombination on both primary and secondary metabolism as, for example, the integration of  $\phi$ C31 integrase-based plasmids has been shown to have pleiotropic effects on bacterial physiology(51).

261

Currently, the two most commonly used methods of bacterial gene transfer are conjugation and electroporation, both of which come with several advantages and disadvantages. Electroporation involves the introduction of pores within bacterial membranes via an electric current to allow mass, unrestricted transfer of genetic material into species(52, 53). The efficiency of transformation, however, is species-dependent(52). Unlike electroporation, conjugation is not limited by the size of vectors that can be transformed, and has been used successfully to transfer entire genomes in *E. coli*(54). Additionally, conjugation uses the transfer of DNA as a single strand that is relatively insensitive to the majority of the restriction systems of the cells(55). Thus conjugation may have advantages over electroporation. In this study, we successfully integrated a plasmid into the *attB* sites for TG1 and R4 integrases by conjugation, thus supplementing the potential gene transfer methods that could be

274 used in the genus *Amycolatopsis*.

275

276 In conclusion, we have identified highly conserved sequences of the *attB* sites for  
 277 TG1 and R4 integrases within the genus *Amycolatopsis* and demonstrated their use in  
 278 conjugative DNA transfer. The *A. marina* DSM45569 *attB* sites showed slightly lower  
 279 recombination efficiencies *in vitro* than the previously identified *attB* sites from  
 280 *Streptomyces* spp. However, this slight reduction is not enough by itself to explain  
 281 the order of magnitude reductions in conjugation frequencies observed with *A.*  
 282 *marina* compared to *Streptomyces* spp. (Table 3). The conjugation frequencies might  
 283 be increased by optimising conjugation conditions. Alternatively, efficiently used *attB*  
 284 sites for the widely used vectors, such as those based on phiC31 *int/attP* could be  
 285 incorporated into the *Amycolatopsis* genome using TG1 or R4 integrating plasmids as  
 286 described here. In short, this work shows that integrative vectors are viable and  
 287 promising tools for the genetic engineering of rare Actinomycetes.

## 288 Acknowledgments

289 This work was supported by the Biotechnology and Biological Sciences Research  
 290 Council project grant BB/K003356/1, and Buvani Murugesan acknowledges the  
 291 receipt of a summer studentship from the Department of Biology, University of York.

## 292 References

- 293 1. Jones SE, Ho L, Rees CA, Hill JE, Nodwell JR, Elliot MA. 2017. *Streptomyces* exploration is  
 294 triggered by fungal interactions and volatile signals. *Elife* 6:e21738.
- 295 2. Zarins-Tutt JS, Barberi TT, Gao H, Mearns-Spragg A, Zhang L, Newman DJ, Goss RJM. 2016.  
 296 Prospecting for new bacterial metabolites: a glossary of approaches for inducing, activating  
 297 and upregulating the biosynthesis of bacterial cryptic or silent natural products. *Natural*  
 298 *product reports* 33:54-72.
- 299 3. Jose PA, Jebakumar SRD. 2013. Non-streptomycete actinomycetes nourish the current  
 300 microbial antibiotic drug discovery. *Frontiers in microbiology* 4.
- 301 4. Jung H-M, Kim S-Y, Moon H-J, Oh D-K, Lee J-K. 2007. Optimization of culture conditions and  
 302 scale-up to pilot and plant scales for vancomycin production by *Amycolatopsis orientalis*.  
 303 *Applied microbiology and biotechnology* 77:789-795.
- 304 5. Li C, Liu X, Lei C, Yan H, Shao Z, Wang Y, Zhao G, Wang J, Ding X. 2017. RifZ (AMED\_0655) is a  
 305 pathway-specific regulator for rifamycin biosynthesis in *Amycolatopsis mediterranei*. *Applied*  
 306 *and Environmental Microbiology* 83:e03201-16.
- 307 6. Hashizume H, Iijima K, Yamashita K, Kimura T, Wada S-i, Sawa R, Igarashi M. 2017. Valgamicin

308 C, a novel cyclic depsipeptide containing the unusual amino acid cleonine, and related  
309 valgamins A, T and V produced by *Amycolatopsis* sp. ML1-hF4. *The Journal of*  
310 *Antibiotics*:ja2017135.

311 7. Li X, Wu X, Zhu J, Shen Y. 2017. Amexanthomycins A–J, pentangular polyphenols produced by  
312 *Amycolatopsis mediterranei* S699Δ rfa. *Applied Microbiology and Biotechnology*:1-14.

313 8. Schwarz PN, Buchmann A, Roller L, Kulik A, Gross H, Wohlleben W, Stegmann E. 2017. The  
314 immunosuppressant Brasilicardin: Determination of the Biosynthetic Gene Cluster in the  
315 Heterologous Host *Amycolatopsis japonicum*. *Biotechnology Journal*.

316 9. Kumari R, Singh P, Lal R. 2016. Genetics and genomics of the genus *Amycolatopsis*. *Indian*  
317 *journal of microbiology* 56:233-246.

318 10. Colloms SD, Merrick CA, Olorunniji FJ, Stark WM, Smith MC, Osbourn A, Keasling JD, Rosser SJ.  
319 2013. Rapid metabolic pathway assembly and modification using serine integrase site-specific  
320 recombination. *Nucleic acids research* 42:e23-e23.

321 11. Fogg PC, Colloms S, Rosser S, Stark M, Smith MC. 2014. New applications for phage integrases.  
322 *Journal of molecular biology* 426:2703-2716.

323 12. Smith MC. 2015. Phage-encoded serine integrases and other large serine recombinases, p  
324 253-272, *Mobile DNA III*. American Society of Microbiology.

325 13. Sosio M, Giusino F, Cappellano C, Bossi E, Puglia AM, Donadio S. 2000. Artificial chromosomes  
326 for antibiotic-producing actinomycetes. *Nature biotechnology* 18:343-345.

327 14. Hong Y, Hondalus MK. 2008. Site-specific integration of *Streptomyces* ΦC31 integrase-based  
328 vectors in the chromosome of *Rhodococcus equi*. *FEMS microbiology letters* 287:63-68.

329 15. Saha S, Zhang W, Zhang G, Zhu Y, Chen Y, Liu W, Yuan C, Zhang Q, Zhang H, Zhang L. 2017.  
330 Activation and characterization of a cryptic gene cluster reveals a cyclization cascade for  
331 polycyclic tetramate macrolactams. *Chemical Science* 8:1607-1612.

332 16. Thorpe HM, Smith MC. 1998. In vitro site-specific integration of bacteriophage DNA catalyzed  
333 by a recombinase of the resolvase/invertase family. *Proceedings of the National Academy of*  
334 *Sciences* 95:5505-5510.

335 17. Rutherford K, Van Duyne GD. 2014. The ins and outs of serine integrase site-specific  
336 recombination. *Current opinion in structural biology* 24:125-131.

337 18. Baltz RH. 2012. *Streptomyces* temperate bacteriophage integration systems for stable genetic  
338 engineering of actinomycetes (and other organisms). *Journal of industrial microbiology &*  
339 *biotechnology* 39:661-672.

340 19. Stegmann E, Pelzer S, Wilken K, Wohlleben W. 2001. Development of three different gene  
341 cloning systems for genetic investigation of the new species *Amycolatopsis japonicum*  
342 MG417-CF17, the ethylenediaminedisuccinic acid producer. *Journal of biotechnology*  
343 92:195-204.

344 20. Lei X, Zhang C, Jiang Z, Li X, Shi Y, Liu M, Xie Y, Wang L, Hong B. 2017. Complete genome  
345 sequence of *Amycolatopsis orientalis* CPCC200066, the producer of norvancomycin. *Journal*  
346 *of biotechnology* 247:6-10.

347 21. Li C, Zhou L, Wang Y, Zhao G, Ding X. 2017. Conjugation of pBT1-derived integrative plasmid  
348 pDZL802 in *Amycolatopsis mediterranei* U32. *Bioengineered* 8:549-554.

349 22. Bian J, Li Y, Wang J, Song F-H, Liu M, Dai H-Q, Ren B, Gao H, Hu X, Liu Z-H. 2009.  
350 *Amycolatopsis marina* sp. nov., an actinomycete isolated from an ocean sediment.  
351 *International journal of systematic and evolutionary microbiology* 59:477-481.

- 352 23. MacNeil DJ. 1988. Characterization of a unique methyl-specific restriction system in  
353 *Streptomyces avermitilis*. *Journal of bacteriology* 170:5607-5612.
- 354 24. Kieser T, Bibb MJ, Buttner MJ, Chater KF, Hopwood DA. 2000. *Practical Streptomyces Genetics*.  
355 The John Innes Foundation, Norwich.
- 356 25. Shirling Et, Gottlieb D. 1966. Methods for characterization of *Streptomyces* species1.  
357 *International Journal of Systematic and Evolutionary Microbiology* 16:313-340.
- 358 26. Sambrook J, Russell DW. 2001. *Molecular cloning: a laboratory manual*. Cold Spring Harbor  
359 Laboratory Press, New York.
- 360 27. Fayed B, Ashford DA, Hashem AM, Amin MA, El Gazayerly ON, Gregory MA, Smith MC. 2015.  
361 Multiplexed integrating plasmids for engineering the erythromycin gene cluster for  
362 expression in *Streptomyces* and combinatorial biosynthesis. *Applied and environmental*  
363 *microbiology*:AEM. 02403-15.
- 364 28. Wilkinson CJ, Hughes-Thomas ZA, Martin CJ, Bohm I, Mironenko T, Deacon M, Wheatcroft M,  
365 Wirtz G, Staunton J, Leadlay PF. 2002. Increasing the efficiency of heterologous promoters in  
366 actinomycetes. *Journal of molecular microbiology and biotechnology* 4:417-426.
- 367 29. Morita K, Yamamoto T, Fusada N, Komatsu M, Ikeda H, Hirano N, Takahashi H. 2009. The  
368 site-specific recombination system of actinophage TG1. *FEMS microbiology letters*  
369 297:234-240.
- 370 30. Shirai M, Nara H, Sato A, Aida T, Takahashi H. 1991. Site-specific integration of the  
371 actinophage R4 genome into the chromosome of *Streptomyces parvulus* upon lysogenization.  
372 *Journal of bacteriology* 173:4237-4239.
- 373 31. Rowley PA, Smith MC, Younger E, Smith MC. 2008. A motif in the C-terminal domain of  $\phi$ C31  
374 integrase controls the directionality of recombination. *Nucleic acids research* 36:3879-3891.
- 375 32. Miura T, Hosaka Y, Yan-Zhuo Y, Nishizawa T, Asayama M, Takahashi H, Shirai M. 2011. In vivo  
376 and in vitro characterization of site-specific recombination of actinophage R4 integrase. *The*  
377 *Journal of general and applied microbiology* 57:45-57.
- 378 33. Morita K, Morimura K, Fusada N, Komatsu M, Ikeda H, Hirano N, Takahashi H. 2012.  
379 Site-specific genome integration in alphaproteobacteria mediated by TG1 integrase. *Applied*  
380 *microbiology and biotechnology* 93:295-304.
- 381 34. Combes P, Till R, Bee S, Smith MC. 2002. The *Streptomyces* genome contains multiple  
382 pseudo-attB sites for the  $\phi$ C31-encoded site-specific recombination system. *Journal of*  
383 *bacteriology* 184:5746-5752.
- 384 35. Fogg PC, Haley JA, Stark WM, Smith MC. 2016. Genome integration and excision by a new  
385 *Streptomyces* bacteriophage,  $\phi$ Joe. *Applied and environmental microbiology*:AEM. 02767-16.
- 386 36. Ghosh P, Pannunzio NR, Hatfull GF. 2005. Synapsis in phage Bxb1 integration: selection  
387 mechanism for the correct pair of recombination sites. *Journal of molecular biology*  
388 349:331-348.
- 389 37. Lazarevic V, Düsterhöft A, Soldo B, Hilbert H, Mauel C, Karamata D. 1999. Nucleotide  
390 sequence of the *Bacillus subtilis* temperate bacteriophage SP $\beta$ c2. *Microbiology*  
391 145:1055-1067.
- 392 38. Fayed B, Younger E, Taylor G, Smith MC. 2014. A novel *Streptomyces* spp. integration vector  
393 derived from the *S. venezuelae* phage, SV1. *BMC biotechnology* 14:51.
- 394 39. Christiansen B, Johnsen M, Stenby E, Vogensen F, Hammer K. 1994. Characterization of the  
395 lactococcal temperate phage TP901-1 and its site-specific integration. *Journal of bacteriology*

176:1069-1076.

40. Li X, Zhou X, Deng Z. 2003. Vector systems allowing efficient autonomous or integrative gene cloning in *Micromonospora* sp. strain 40027. *Applied and environmental microbiology* 69:3144-3151.

41. Marcone GL, Carrano L, Marinelli F, Beltrametti F. 2010. Protoplast preparation and reversion to the normal filamentous growth in antibiotic-producing uncommon actinomycetes. *The Journal of antibiotics* 63:83-88.

42. Wolf T, Gren T, Thieme E, Wibberg D, Zemke T, Pühler A, Kalinowski J. 2016. Targeted genome editing in the rare actinomycete *Actinoplanes* sp. SE50/110 by using the CRISPR/Cas9 System. *Journal of biotechnology* 231:122-128.

43. Wagner N, Oßwald C, Biener R, Schwartz D. 2009. Comparative analysis of transcriptional activities of heterologous promoters in the rare actinomycete *Actinoplanes friuliensis*. *Journal of biotechnology* 142:200-204.

44. Anzai Y, Iizaka Y, Li W, Idemoto N, Tsukada S-i, Koike K, Kinoshita K, Kato F. 2009. Production of rosamicin derivatives in *Micromonospora rosaria* by introduction of d-mycinoside biosynthetic gene with  $\Phi$ C31-derived integration vector pSET152. *Journal of industrial microbiology & biotechnology* 36:1013.

45. Kim D-Y, Hwang Y-I, Choi S-U. 2011. Cloning of *metK* from *Actinoplanes teichomyceticus* ATCC31121 and effect of its high expression on antibiotic production. *Journal of microbiology and biotechnology* 21:1294-1298.

46. Shen Y, Huang H, Zhu L, Luo M, Chen D. 2012. Type II thioesterase gene (*ECO-orf27*) from *Amycolatopsis orientalis* influences production of the polyketide antibiotic, ECO-0501 (LW01). *Biotechnology letters* 34:2087-2091.

47. Lee K, Lee B, Ryu J, Kim D, Kim Y, Lim SK. 2016. Increased vancomycin production by overexpression of MbtH-like protein in *Amycolatopsis orientalis* KFCC10990P. *Letters in applied microbiology* 63:222-228.

48. Mandal S, Dhar G, Avliyakov NK, Haykinson MJ, Johnson RC. 2013. The site-specific integration reaction of *Listeria* phage A118 integrase, a serine recombinase. *Mobile DNA* 4:2-2.

49. Yoon B, Kim I, Nam J-A, Chang H-I, Ha CH. 2016. In vivo and in vitro characterization of site-specific recombination of a novel serine integrase from the temperate phage EFC-1. *Biochemical and biophysical research communications* 473:336-341.

50. Yang L, Nielsen AA, Fernandez-Rodriguez J, McClune CJ, Laub MT, Lu TK, Voigt CA. 2014. Permanent genetic memory with > 1-byte capacity. *Nature methods* 11:1261-1266.

51. Talà A, Damiano F, Gallo G, Pinatell E, Calcagnile M, Testini M, Fico D, Rizzo D, Suter A, Renzone G. 2018. Pirin: A novel redox-sensitive modulator of primary and secondary metabolism in *Streptomyces*. *Metabolic engineering* 48:254-268.

52. Bekker V, Dodd A, Brady D, Rumbold K. 2014. Tools for metabolic engineering in *Streptomyces*. *Bioengineered* 5:293-299.

53. Cadoret F, Soscia C, Voulhoux R. 2014. Gene transfer: transformation/electroporation. *Pseudomonas Methods and Protocols*:11-15.

54. Isaacs FJ, Carr PA, Wang HH, Lajoie MJ, Sterling B, Kraal L, Tolonen AC, Gianoulis TA, Goodman DB, Reppas NB. 2011. Precise manipulation of chromosomes in vivo enables genome-wide

439 codon replacement. *Science* 333:348-353.  
 440 55. Dominguez W, O'Sullivan DJ. 2013. Developing an efficient and reproducible  
 441 conjugation-based gene transfer system for bifidobacteria. *Microbiology* 159:328-338.  
 442

## 443    **Figures**

444    **Figure 1.** Plasmids used in this study. The primer binding sites are indicated. (A)

445    Integrating plasmids pHG4 and pJH1R4; (B) PCR template plasmid pHG1.

446    **Figure 2.** Alignment of R4 and TG1 *attB* sites in *A. marina* DSM45569 and other

447    *Amycolatopsis* species. GenBank accession nos. of DNA sequences: *A. alba*

448    (NMQU01000019.1), *A. antarctica* (NKYE01000021.1), *A. azurea* (MUXN01000005.1),

449    *A. kentuckyensis* (MUMI01000226.1), *A. lurida* (FNTA01000004.1), *A. nigrescens*

450    (ARVW01000001.1), *A. niigatensis* (PJMY01000003.1), *A. orientalis*

451    (ASXH01000007.1), *A. pretoriensis* (MUMK01000092.1), *A. regifaucium*

452    (LQCI01000034.1), *A. rubida* (FOWC01000001.1), *A. sacchari* (FORP01000010.1), *A.*

453    *thailandensis* (NMQT01000219.1), *A. thermoflava* (AXBH01000004.1), *A.*

454    *tolypomycina* (FNSO01000004.1), *A. xylanica* (FNON01000002.1), *Streptomyces*

455    *avermitilis* (NC\_003155.5) and *S. parvulus* (CP015866.1).

456    **Figure 3.** (A) Design and synthesis of DNA substrate *attB*. The *attB* sites were fused at

457    the end of forward primers, to amplify a sequence flanked with *attB* from an

458    unrelated DNA template, pHG1 in this case. (B) Design and synthesis of DNA

459    substrate *attP*. The *attP* sites were amplified directly from integrating vectors

460    carrying TG1/*attP* (pHG4) or R4/*attP* (pJH1R4). (C) Recombination substrates and

461    their expected products. (D) *In vitro* recombination between DNA fragments

462    containing TG1 *attB*<sup>Am</sup> (1627 bp) and TG1 *attP* (2471 bp; left), and R4 *attB*<sup>Am</sup> (1854 bp)

463    and R4 *attP* (990 bp; right). The expected products of the TG1 integrase-mediated

464    reaction were a 4.1 kb DNA fragment containing the *attR*<sup>Am</sup> site, and a 53 bp

465    fragment containing *attL*<sup>Am</sup> (not observed). For the R4 integrase recombination

466    reaction, the expected products were a 2.8 kb fragment containing *attR*<sup>Am</sup>, and a 51

467    bp *attL*<sup>Am</sup> fragment (not observed). (E) *In vitro* recombination between DNA

468    fragments containing TG1 *attB*<sup>Sa</sup> (1035 bp) and TG1 *attP* (2471 bp; left), and R4 *attB*<sup>Sp</sup>

469    (1855 bp) and R4 *attP* (990 bp; right). The expected products were a 3.5 kb fragment

470    containing *attR*<sup>Sa</sup> for the TG1 reaction, and a 2.8 kb fragment containing *attR*<sup>Sp</sup> for the

471    R4 reaction. M: Fast DNA Ladder (NEB, USA).



472 **Figure 4.** PCR confirmation of site-specific integration in the exconjugants. (A) Design  
 473 of primers. (B) PCR (using primers TG1-attL-Am-for/rev) of the expected TG1  
 474 attL-containing fragment from *A. marina* DSM45569:pHG4. (C) PCR (using primers  
 475 R4-attL-Am-for/rev) of the expected R4 attL-containing fragment from *A. marina*  
 476 DSM45569:pJH1R4. M: Fast DNA Ladder. Colonies 1 to 6 are independent  
 477 exconjugants.

478 **Figure 5.** The insertion sites of TG1 and R4 integration plasmids in *A. marina*  
 479 DSM45569. Sequencing (using primers TG1-attL-Am-for or R4-attL-Am-for) of PCR  
 480 products containing attL from exconjugants validated the site-specific recombination  
 481 of the TG1 and R4 attB sites in *A. marina* DSM45569 after introduction of pHG4 or  
 482 pJH1R4, respectively.

483

484 **Figure 1**

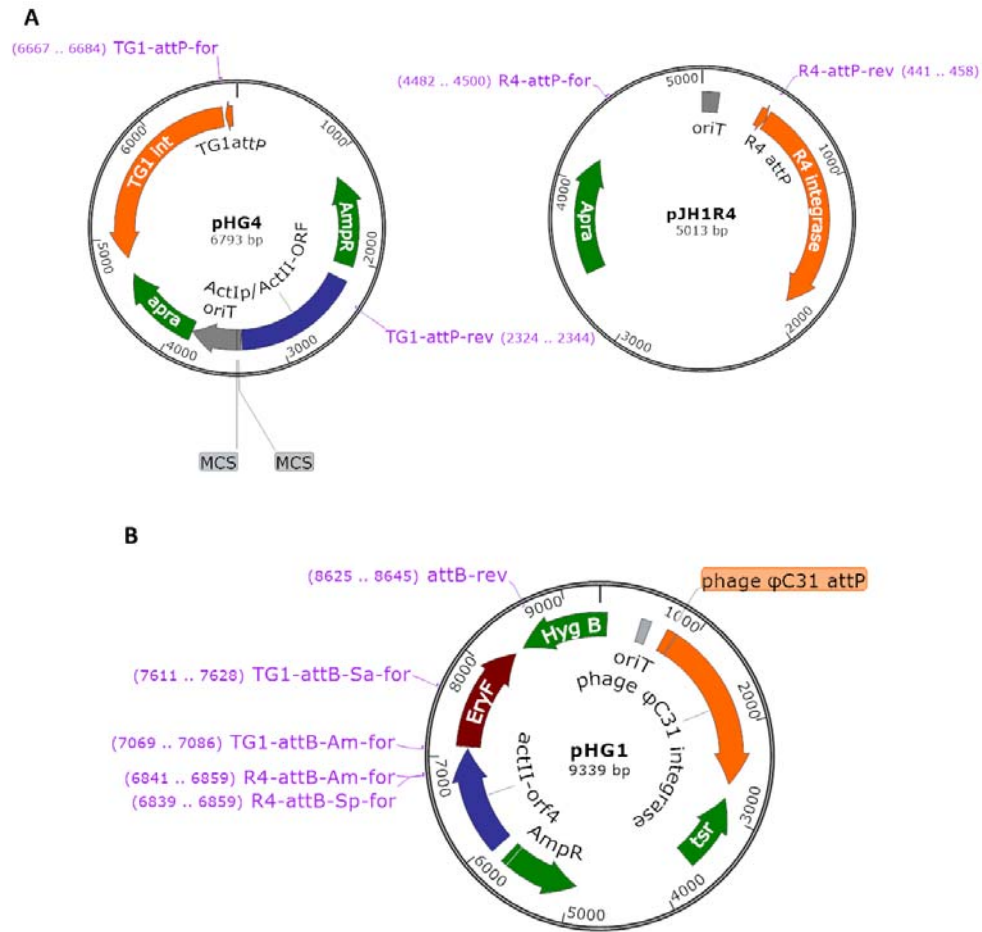

485

486 **Figure 2.**

A. R4 *attB* sites

|                         |                                                     |
|-------------------------|-----------------------------------------------------|
| <i>A. marina</i>        | GGTTGCCCATCACCATGCCGAAGCAGTGATAGAAAGGGAACCGGGATGCAG |
| <i>A. kentuckyensis</i> | GGTTGCCCATCACCATGCCGAAGCAGTGGTAGAAAGGGCACCGGGATGCAG |
| <i>A. nigrescens</i>    | GGTTGCCCATCACCATGCCGAAGCAGTGGTAGAAAGGGCACCGGGATGCAG |
| <i>A. niigatensis</i>   | GGTTGCCCATCACCATGCCGAAGCAGTGGTAGAAAGGGCACCGGGATGCAG |
| <i>A. orientalis</i>    | GGTTGCCCATCACCATGCCGAAGCAGTGGTAGAAAGGGCACCGGGATGCAG |
| <i>A. pretoriensis</i>  | GGTTGCCCATCACCATGCCGAAGCAGTGGTAGAAAGGGCACCGGGATGCAG |
| <i>A. rubida</i>        | GGTTGCCCATCACCATGCCGAAGCAGTGGTAGAAAGGGCACCGGGATGCAG |
| <i>A. tolypomycina</i>  | GGTTGCCCATCACCATGCCGAAGCAGTGGTAGAAAGGGCACCGGGATGCAG |
| <i>A. xylanica</i>      | GGTTGCCCATCACCATGCCGAAGCAGTGATAGAAAGGGCACCGGGATGCAG |
| <i>S. parvulus</i>      | AGTTGCCCATCACCATGCCGAAGCAGTGGTAGAAAGGGCACCGGCAGACAC |

B. TG1 *attB* sites

|                         |                                                     |
|-------------------------|-----------------------------------------------------|
| <i>A. marina</i>        | TCGATCTCCAGTGCGGGCAAGACGTTCAACTGCACCGGCTGGAAGATCGG  |
| <i>A. alba</i>          | TCGATCTCCAGCGCGGGCAAGACGTTCAACTGCACCGGCTGGAAGATCGG  |
| <i>A. antarctica</i>    | AGCATCTCCAGTGCGGGCAAGACGTTCAACTGCACCGGCTGGAAGATCGG  |
| <i>A. azurea</i>        | TCGATCTCCAGCGCGGGCAAGACGTTCAACTGCACCGGCTGGAAGATCGG  |
| <i>A. lurida</i>        | TCGATCTCCAGCGCGGGCAAGACGTTCAACTGCACCGGCTGGAAGATCGG  |
| <i>A. regifaucium</i>   | TCGATCTCCAGCGCGGGCAAGACGTTCAACTGCACCGGCTGGAAGATCGG  |
| <i>A. sacchari</i>      | TCGATCTCCAGCGCGGGCAAGACGTTCAACTGCACCGGCTGGAAGATCGG  |
| <i>A. thaitandensis</i> | TCGATCTCCAGCGCGGGCAAGACGTTCAACTGCACCGGCTGGAAGATCGG  |
| <i>A. thermoflava</i>   | TCGATCTCCAGCGCGGGCAAGACGTTCAACTGCACCGGCTGGAAGATCGG  |
| <i>S. avermitilis</i>   | TCGATCAGCTCCGCGGGCAAGACCTTCTCCTTCACGGGGTGGGAAGGTCGG |

487

488

489 **Figure 3.**

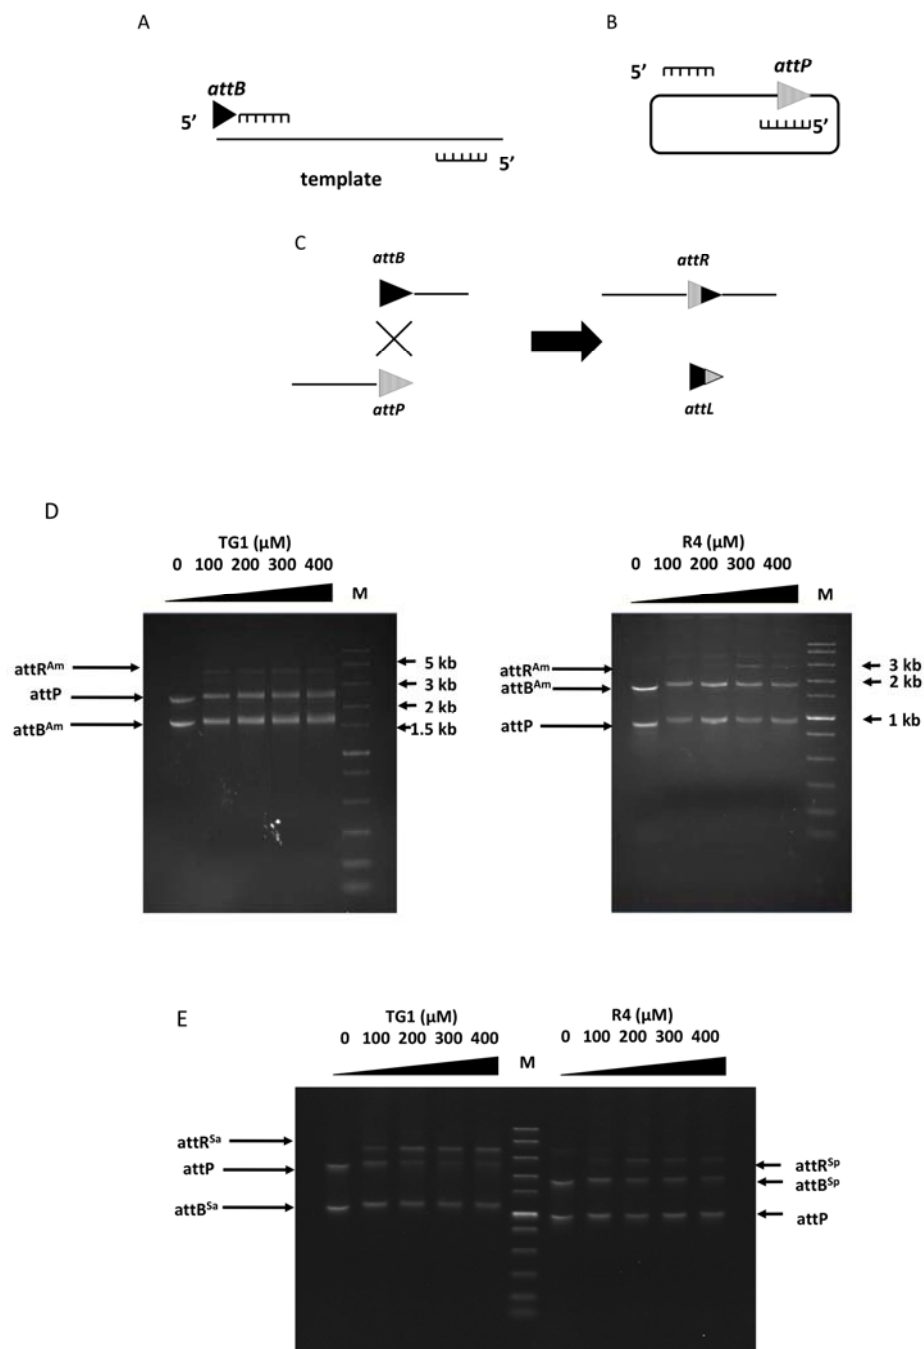

490

491

492 **Figure 4.**

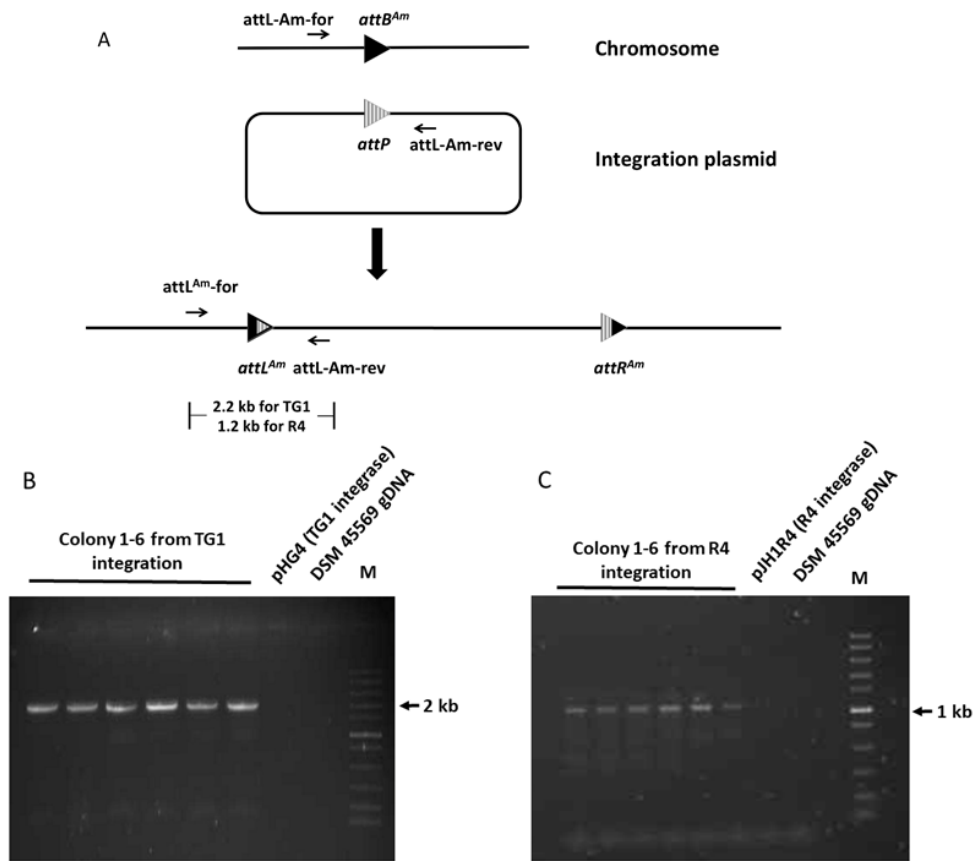

493

494

495 **Figure 5.**

A

```
attB - A. marina GGTGCCCCATCACCATGCCGAAGCAGTG-----
attL - exconjugant GGTGCCCCATCACCATGCCGAAGCAGTGGTACTGCTTGTGGGTACACTCT
attP - pJH1R4 -----GAAGCAGTGGTACTGCTTGTGGGTACACTCT
```

B

```
attB - A. marina GATCTCCAGTGCGGGCAAGACGTT-----
attL - exconjugant GATCTCCAGTGCGGGCAAGACGTTGCTCTTACCCAGTTGGGCGGGATAGC
attP - pHG4 -----TTGCTCTTACCCAGTTGGGCGGGATAGC
```

496

497

498 **TABLE 1** Oligonucleotides used in this study

| Oligonucleotide | Sequence (5'-3')                                                                 |
|-----------------|----------------------------------------------------------------------------------|
| pHG1A-for       | CGAACGCATCGATTAATTAAGGAGGATCGTATGACGACCGTTCCCG                                   |
| pHG1A-rev       | CGTGGTGGGCGCTAGCCTCCTCTAGTCATCCGTCG                                              |
| pHG1-for        | ACTAGAGGAGGCTAGCTTCAATGGAGGAGATGATCGAGG                                          |
| pHG1-rev        | GCAGGTCGACTCTAGATCTCGCTACGCCGCTACG                                               |
| pHG4-for        | CGAACGCATCGATTAATTAAGCGGCCCATATGGAATTCGGTACCGCATGCAGAT<br>CTAGGAACTTCGAAGTTCCCGC |
| pHG4-rev        | TGATTACGCCAAGCTTTCGACTCTAGAGTAAGCGTCACGG                                         |
| pJH1R4-for      | CTAGCGATTGCCATGACGTCGGAGCTGCTTACCAATGTC                                          |
| pJH1R4-rev      | AAGAGGCCCGCACCATTCCAAGAGGCCGGCAACTAC                                             |
| TG1-attB-Am-for | <u>TCGATCTCCAGTGCGGGCAAGACGTTCAACTGCACCGGCTGGAAGATCGGGACCA</u><br>CCGGACGAACGCA  |
| TG1-attB-Sa-for | TCGATCAGCTCCGCGGGCAAGACCTTCTCCTTCACGGGGTGAAGGTCGGCGGTG<br>GAGCTCGGAGA            |
| R4-attB-Am-for  | <u>GGTTGCCCATCACCATGCCGAAGCAGTGATAGAAGGGAACCGGGATGCAGGTGA</u><br>GAAGGTGCTCGTGT  |
| R4-attB-Sp-for  | AGTTGCCCATGACCATGCCGAAGCAGTGGTAGAAGGGCACCGGCAGACACGG                             |
| attB-rev        | CTGCATCTCAACGCCTTCCGG                                                            |
| TG1-attP-for    | AACCTTCACGCTCATGCC                                                               |
| TG1-attP-rev    | GTCGAGATTCTCCGTCTCCTG                                                            |
| R4-attP-for     | GATCGGTCTTGCTTGCTC                                                               |
| R4-attP-rev     | ACCCGCAGAGGTGTACCA                                                               |
| TG1-attL-Am-for | ACAACCCACCGGCACCGTCTTCA                                                          |
| TG1-attL-Am-rev | AGTATAGGAACTTCGAAGCAGCTC                                                         |
| R4-attL-Am-for  | CGGCCGGTGATGTTGACGT                                                              |
| R4-attL-Am-rev  | TCGGCCGTCACGATGGTCA                                                              |

499 The possible *attB* sequences identified from the genome sequence of *Amycolatopsis*  
500 *marina* DSM45569 are shown underlined.

501

502 **TABLE 2.** The original *attB* sites for integrases and results of BLAST search

| Integrase | <i>attB</i> sites and the best hit from BLAST                                                                                                                 | Homology (%) | E-value |
|-----------|---------------------------------------------------------------------------------------------------------------------------------------------------------------|--------------|---------|
| φ31       | <i>S.coelicolor</i> CGGTGCGGGGACAGGGCGTGCCCTTGGGCTCCCGGG---CCCGACGTCACCC<br>hit from <i>A.marina</i> GGGTGC GG GGGACAGGGCGTGCCCTTGGGCTCCCGGGACCGACGTCACCC     | 41           | 0.015   |
| φJoe      | <i>S.venezuelae</i> ATCTGGAATGTGGGTCTCCATCTCCGGGCAGACGCCGCAGTCGAAGCACTGG<br>hit from <i>A.marina</i> AGGTCTCCATAGGTCTGGGCGGACGATCCGACGCCGCAGTCGAAGCACTGG      | 30           | 0.60    |
| Bxb1      | <i>Mycobacterium smegma</i> TCGGCCGGCTTCTCGACGACGGCGGCTCCG-TGGTCAGGATCATCCGGGC<br>hit from <i>A.marina</i> TCGGCCGGCTTCTCGACGACGGCGGCTTCTCCGCTGCTGCTGGCTCCGGC | 48           | 0.014   |
| R4        | <i>S.parvulus</i> AGTTGCCCATCACCATGCCGAAGCAGTGGTAGAAGGGACCGGCTACAC<br>hit from <i>A.marina</i> GGTGCGCCATCACCATGCCGAAGCAGTGGTAGAAGGGACCGGCTATGAG              | 84           | 3e-11   |
| SPBc      | No hit                                                                                                                                                        |              |         |
| SV1       | <i>S.venezuelae</i> ATCAGGGCGGTCAAGGCGG-TAGATGTGGAAGACGGCAGCACGGCGAGGAC<br>hit from <i>A.marina</i> --CTTGGGACTCTGGCTGGGTGGCTGTGTCAGGCGGGCAGCACGGCGAGGCG      | 32           | 0.17    |
| TG1       | <i>S.avermitilis</i> TCGATCAGCTCCGCGGGCAAGACCTTCCTCTTCACGGGTGGAAGATCGG<br>hit from <i>A.marina</i> TCGATCTCCAGTCCGGGCAAGACCTTCCTCTTCACGGGTGGAAGATCGG          | 62           | 0.001   |
| TP901     | <i>Lactococcus lactis</i> s ATGCGAACCAATTACATCTGAATCAGGCAATGTTTTCTTTTCTTTTCT<br>hit from <i>A.marina</i> ATGCGAACCAATTACATCTGAATCAGGCAATGTTTTCTTTTCTTTTCT     | 25           | 8.1     |

503

504



505 **TABLE 3.** Conjugation efficiency of pHG4 and pJH1R4 in different species

| Exconjugants/ $10^8$ spores | pHG4               | pJH1R4             |
|-----------------------------|--------------------|--------------------|
| <i>A. marina</i>            | 160                | 20                 |
| <i>S. coelicolor</i>        | $1.47 \times 10^3$ | $3.28 \times 10^4$ |
| <i>S. lividans</i>          | $1.56 \times 10^3$ | $3.33 \times 10^4$ |

506

507
